# Supplementary material for: Synthesis and characterization of metal–organic framework/biomass-derived CoSe/C@C hierarchical structures with excellent sodium storage performance
Source: Royal Society of Chemistry journal article supplement (doi:10.1039/d0nr08569c), 2021-01-01
Supplement: d0nr08569c1.pdf [file d0nr08569c1.pdf]

## Supplementary Information

### Synthesis and characterization of metal-organic framework/biomass-derived CoSe/C@C hierarchical structures with excellent sodium storage performance

Xi Zhang<sup>a</sup>, Peijie He<sup>a</sup>, Bowen Dong<sup>a</sup>, Nan Mu<sup>a</sup>, Yangai Liu<sup>a\*</sup>, Tao Yang<sup>b\*</sup>, Ruiyu Mi<sup>a\*</sup>.

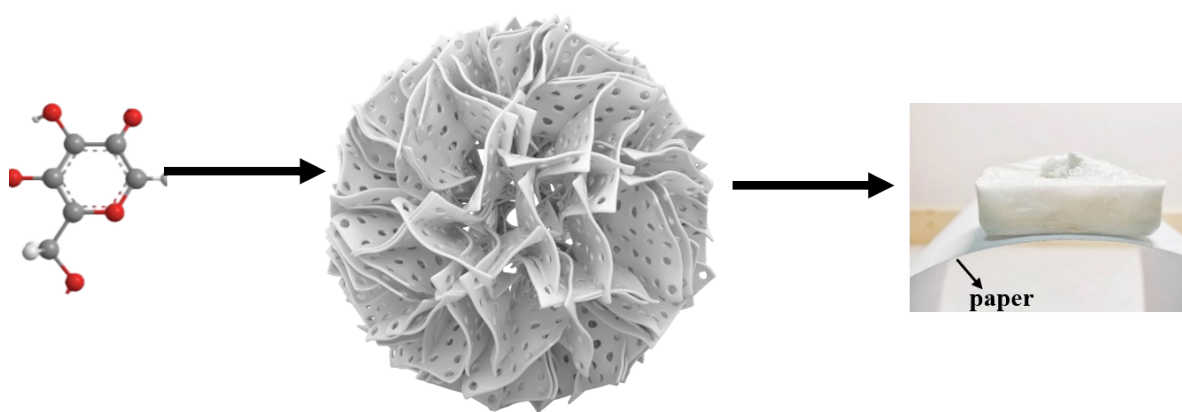

Figure S1. Schematic illustration of CMC fabrication.

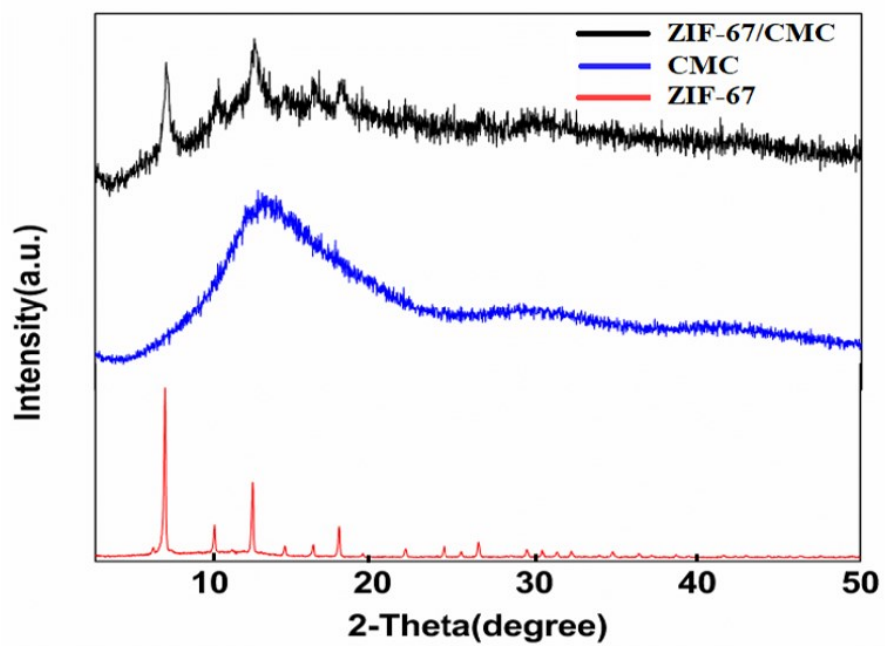

Figure S2. XRD patterns of ZIF-67/CMC, CMC, and ZIF-67.

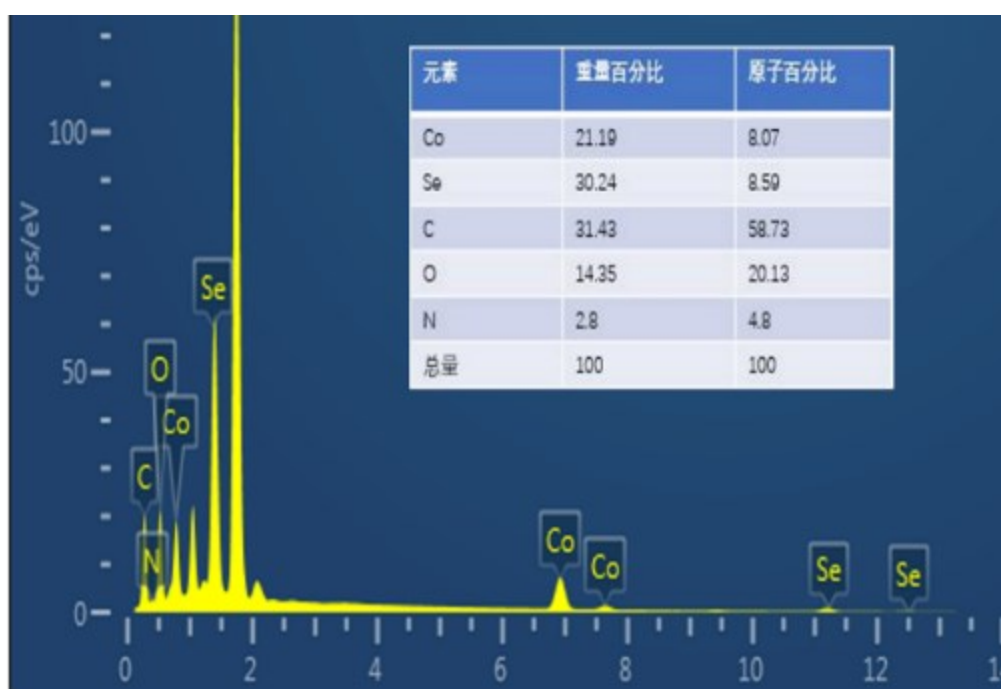

Figure S3. EDS spectrum of CoSe/C@C.

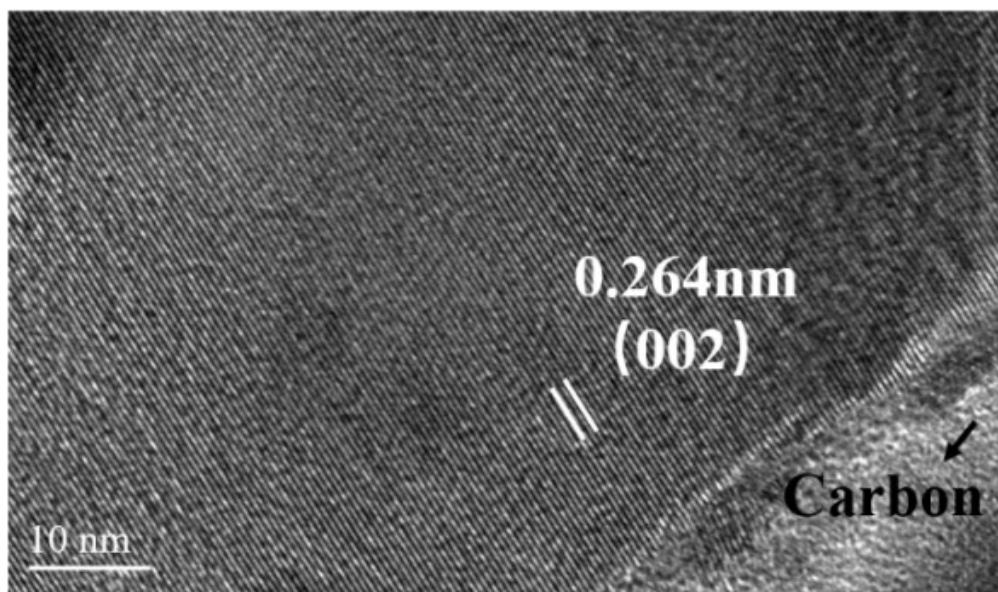

Figure S4. HRTEM images of CoSe/C@C.

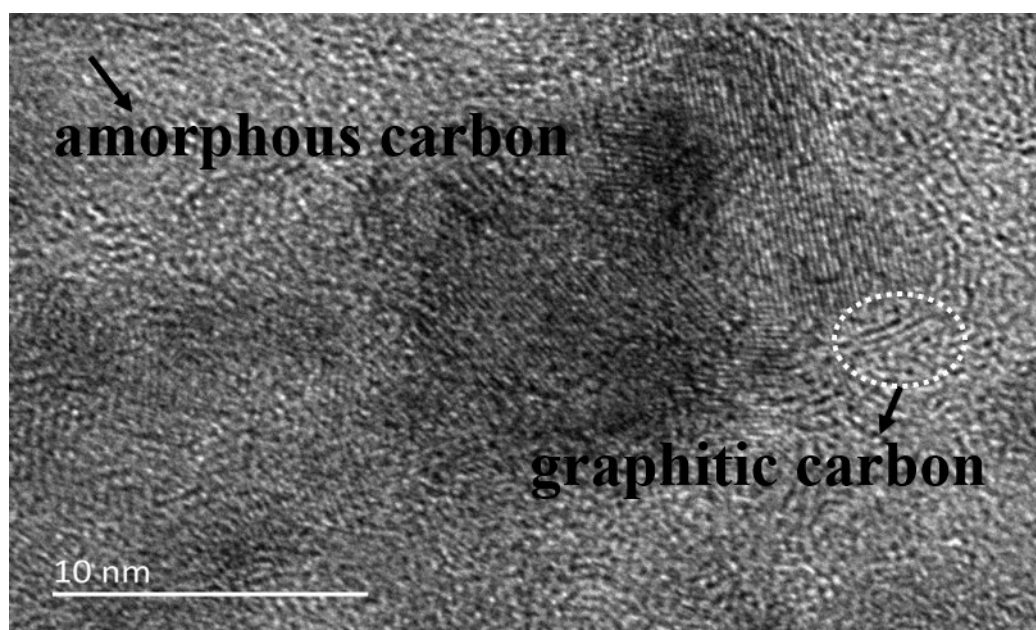

Figure S5. HRTEM images of CoSe/C@C.

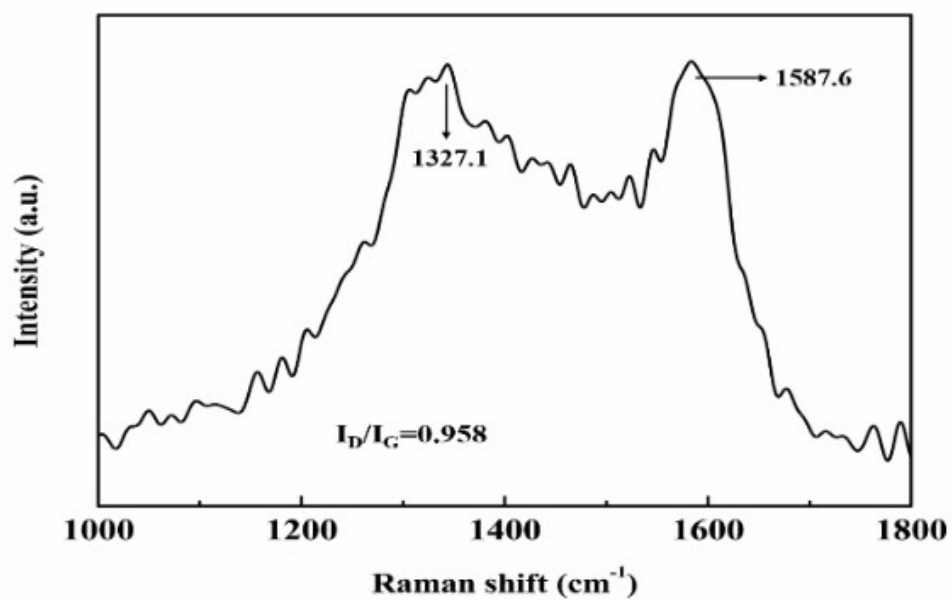

Figure S6. Raman spectra of the CoSe/C.

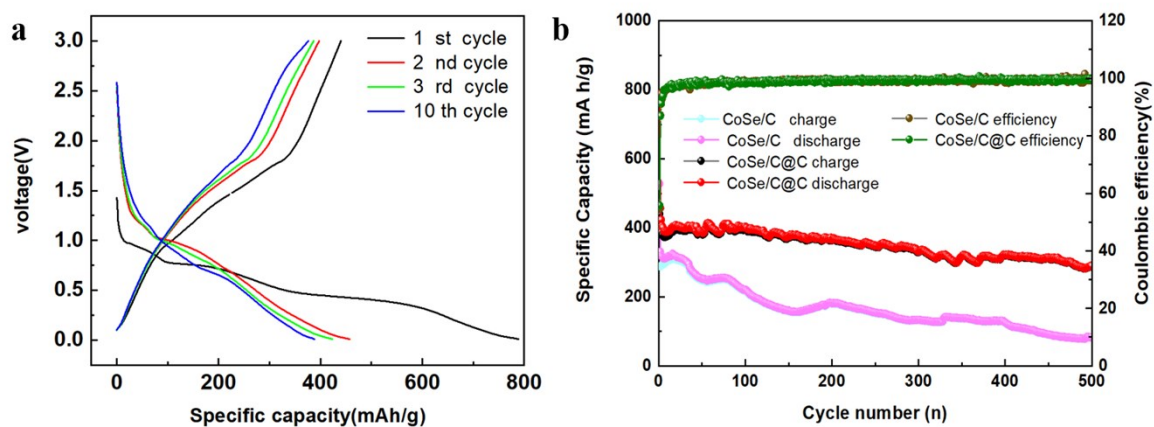

Figure S7. (a) Galvanostatic charge-discharge curves of the CoSe/C@C electrodes at 1 A/g, (b) Cycling performances of CoSe/C@C and CoSe/C electrodes at the current density of 1 A/g.

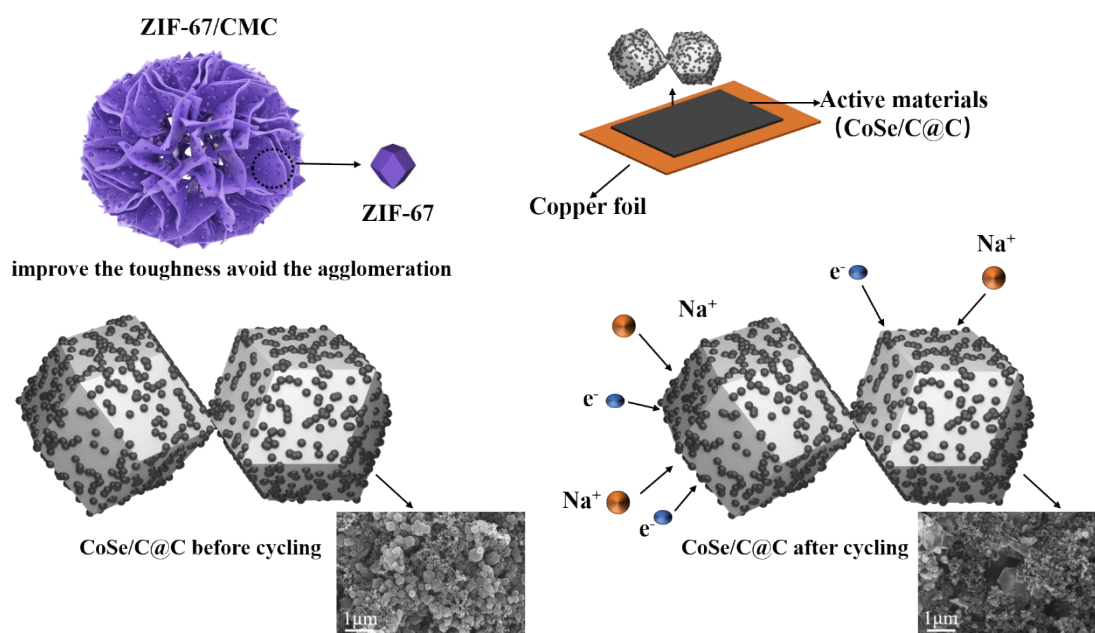

Figure S8. Schematic illustration of fast ionic and electronic transfer enhanced by the hierarchical structure of CoSe/C@C composition.



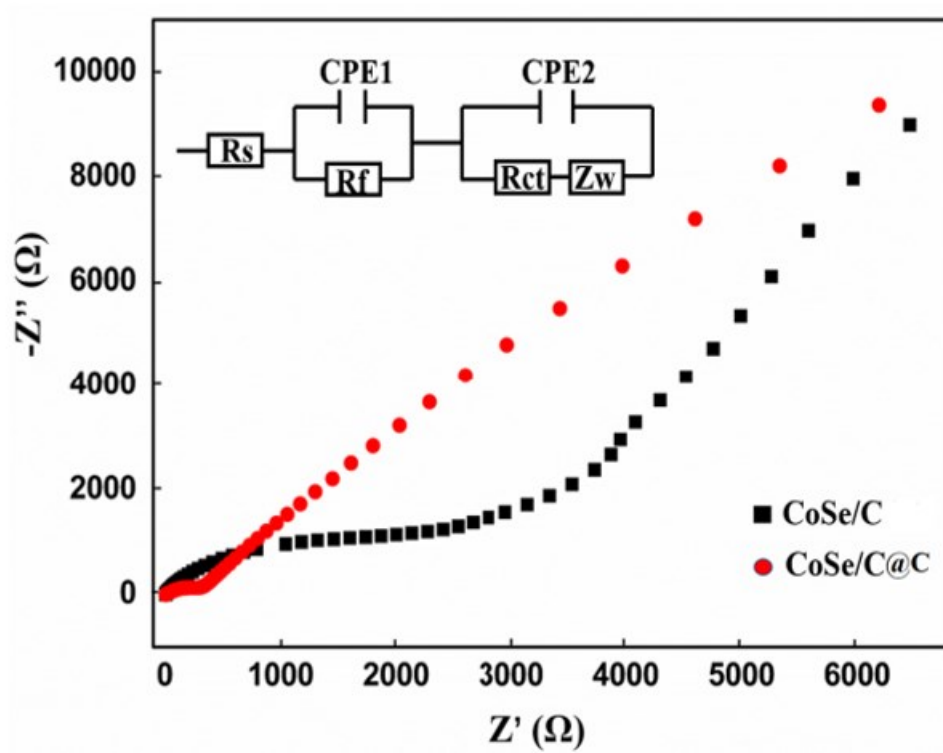

Figure S9. Electrochemical impedance spectra of CoSe/C@C and CoSe/C electrodes after 50 cycles at the open-circuit potential.
